# Supplementary material for: Insomnia and risk of nonalcoholic fatty liver disease: A systematic review and meta-analysis
Source: PubMed Central journal article supplement — J Postgrad Med. 2017 Oct-Dec;63(4):226–31. doi: 10.4103/jpgm.JPGM_140_17 (PMC5664866; doi:10.4103/jpgm.jpgm_140_17), 2017
Supplement: JPGM-63-226_Suppl1.pdf [file JPGM-63-226_Suppl1.pdf]

## Online Supplementary Data

### Search Strategy

Database: Ovid MEDLINE

1. nonalcoholic fatty liver.mp. or exp nonalcoholic fatty liver/
2. non-alcoholic fatty liver.mp.
3. nonalcoholic steatohepatitis.mp.
4. non-alcoholic steatohepatitis.mp.
5. NASH.mp.
6. fatty liver.mp. or exp fatty liver/
7. nonalcoholic liver disease.mp.
8. non-alcoholic liver disease.mp.
9. or/1-8
10. sleep.mp. or exp sleep/
11. exp somnolence/ or exp daytime somnolence/ or somnolence.mp.
12. sleepiness.mp.
13. insomnia.mp. or exp insomnia/
14. or/10-13
15. 9 and 14

Database: EMBASE

1. nonalcoholic fatty liver.mp. or exp nonalcoholic fatty liver/
2. non-alcoholic fatty liver.mp.
3. nonalcoholic steatohepatitis.mp.
4. non-alcoholic steatohepatitis.mp.
5. NASH.mp.
6. fatty liver.mp. or exp fatty liver/
7. nonalcoholic liver disease.mp.
8. non-alcoholic liver disease.mp.
9. or/1-8

10. sleep.mp. or exp sleep/

11. exp somnolence/ or exp daytime somnolence/ or somnolence.mp.

12. sleepiness.mp.

13. insomnia.mp. or exp insomnia/

14. or/10-13

15. 9 and 14
